# Supplementary material for: Biallelic Variants in ENDOG Associated with Mitochondrial Myopathy and Multiple mtDNA Deletions
Source: Cells. 2022 Mar 12;11(6):974. doi: 10.3390/cells11060974 (PMC8946636; doi:10.3390/cells11060974)
Supplement: Supplementary file 1 [file cells-11-00974-s001.zip › cells-1615424-supplementary.pdf]

**Supplemental Table S1: Biochemical analysis of OXPHOS complexes**

|          | CI/CS     | CII/CS   | CI+III/CS | CII+III/CS | CIV/CS    | CS*          |
|----------|-----------|----------|-----------|------------|-----------|--------------|
| Patient  | 2.8 (25%) | 17.0     | 9.6 (26%) | 4.1 (34%)  | 7.0 (15%) | 239.0 (174%) |
| Controls | 11.3±3.3  | 17.6±2.8 | 36.6±6.8  | 12.0±2.1   | 47.6±6.0  | 137.3±15.0   |

CI, CII, CIII, CIV: complexes I, II, III, IV of the Oxidative Phosphorylation system. CS: citrate synthase. \*value in nmol/min mg.

**Supplemental Table S2: Additional candidate variants from NGS analyses**

| Gene                          | cDNA    | Refseq      | Protein   | ACMG       | Associated disease | Inheritance |
|-------------------------------|---------|-------------|-----------|------------|--------------------|-------------|
| <b>C1QBP</b><br>(MIM*601269)  | c.1A>G  | NM_001212.3 | p.(Met1?) | VUS        | MIM#617713         | AR          |
| <b>MRPS34</b><br>(MIM*611994) | c.94C>T | NM_023936.1 | p.Gln32*  | Pathogenic | MIM#617664         | AR          |

ACMG: criteria according to the American college of Medical Genetics; VUS: variant of uncertain significance; AR: autosomal recessive.



## Supplemental Figure S2: Structural analysis of residues affected by the missense variants

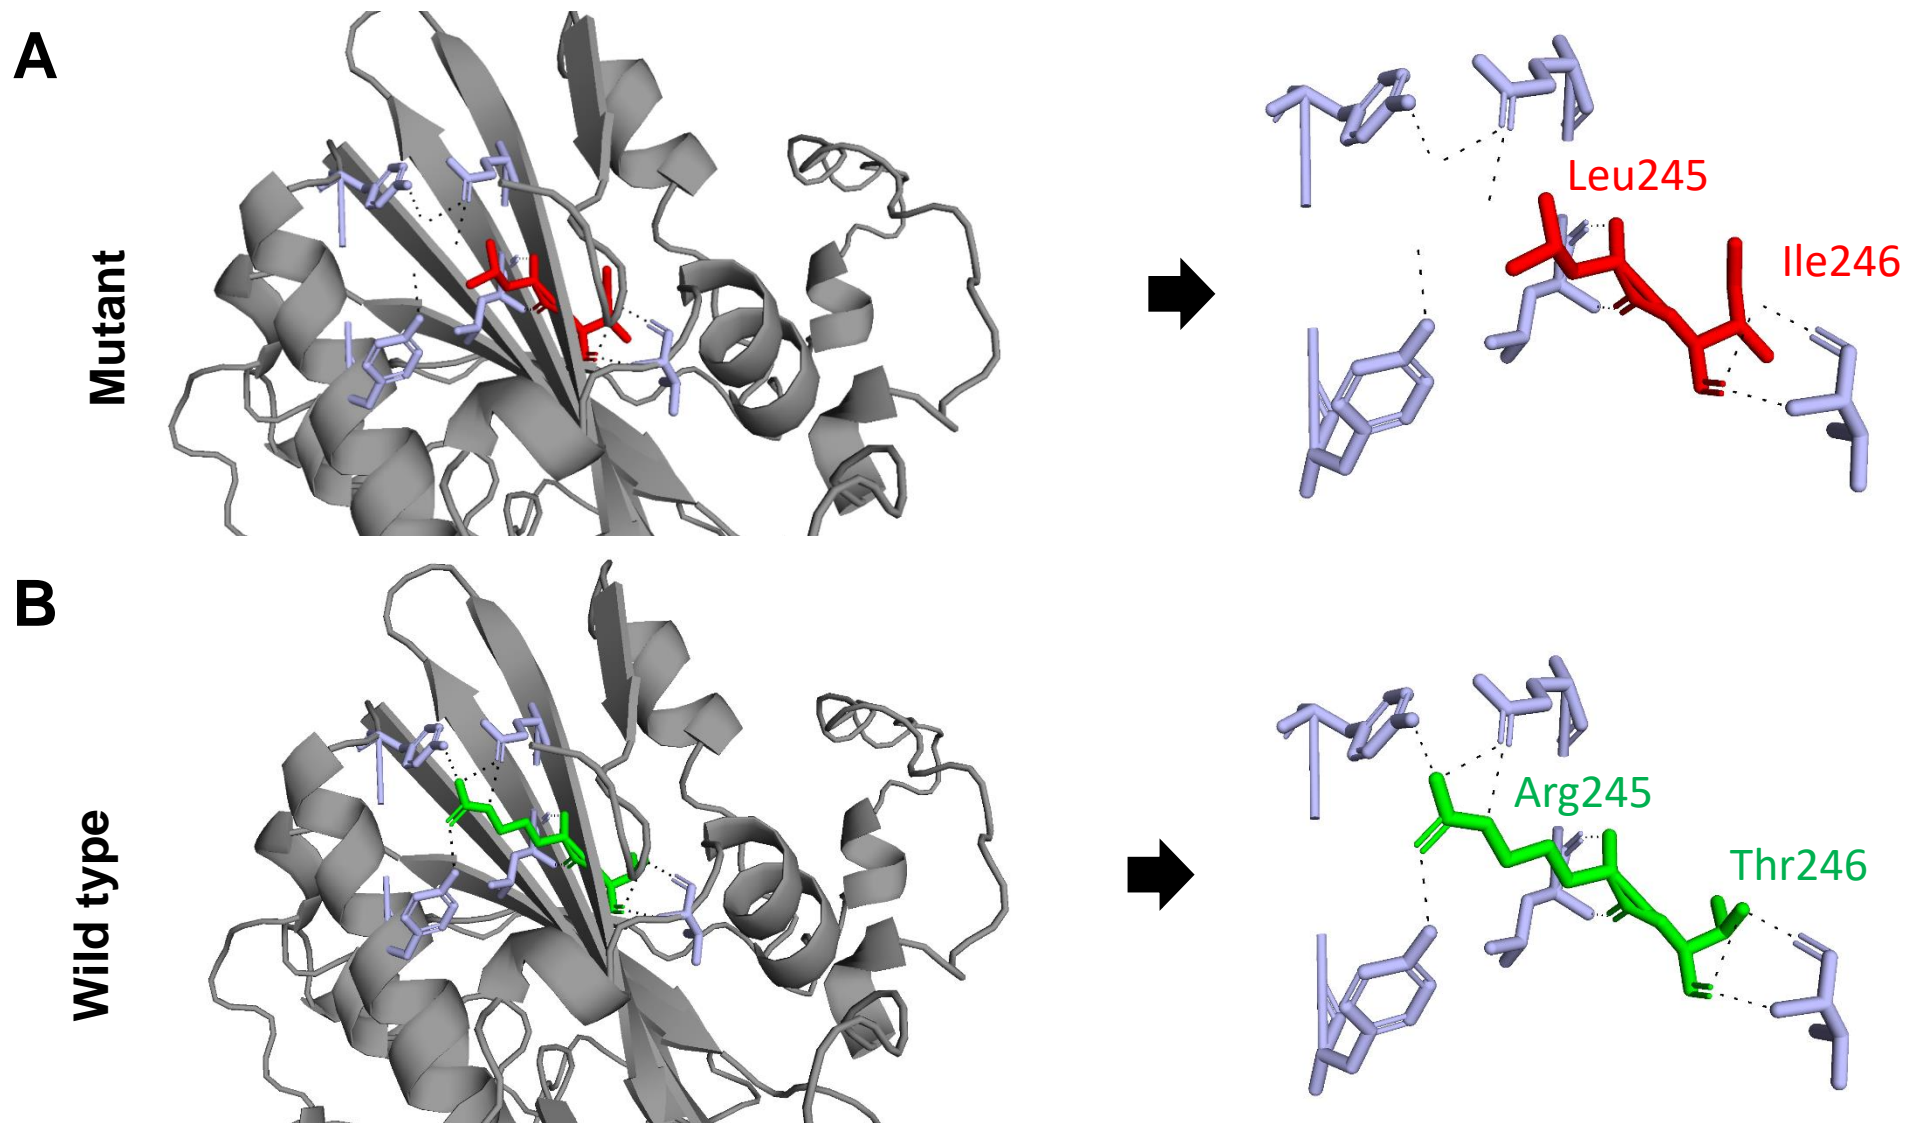

Mapping of the mutant sequence harboring the amino acid substitution p.Arg245Leu-p.Thr246Ile (panels **A**), and the wild type sequence (panels **B**) on ENDOG structure (AF-Q14249-F1). The dotted lines indicate hydrogen bonds. Amino acid numbering is made according to NP\_004426.2.

### Supplemental Figure S3: Immunofluorescence studies in fibroblasts

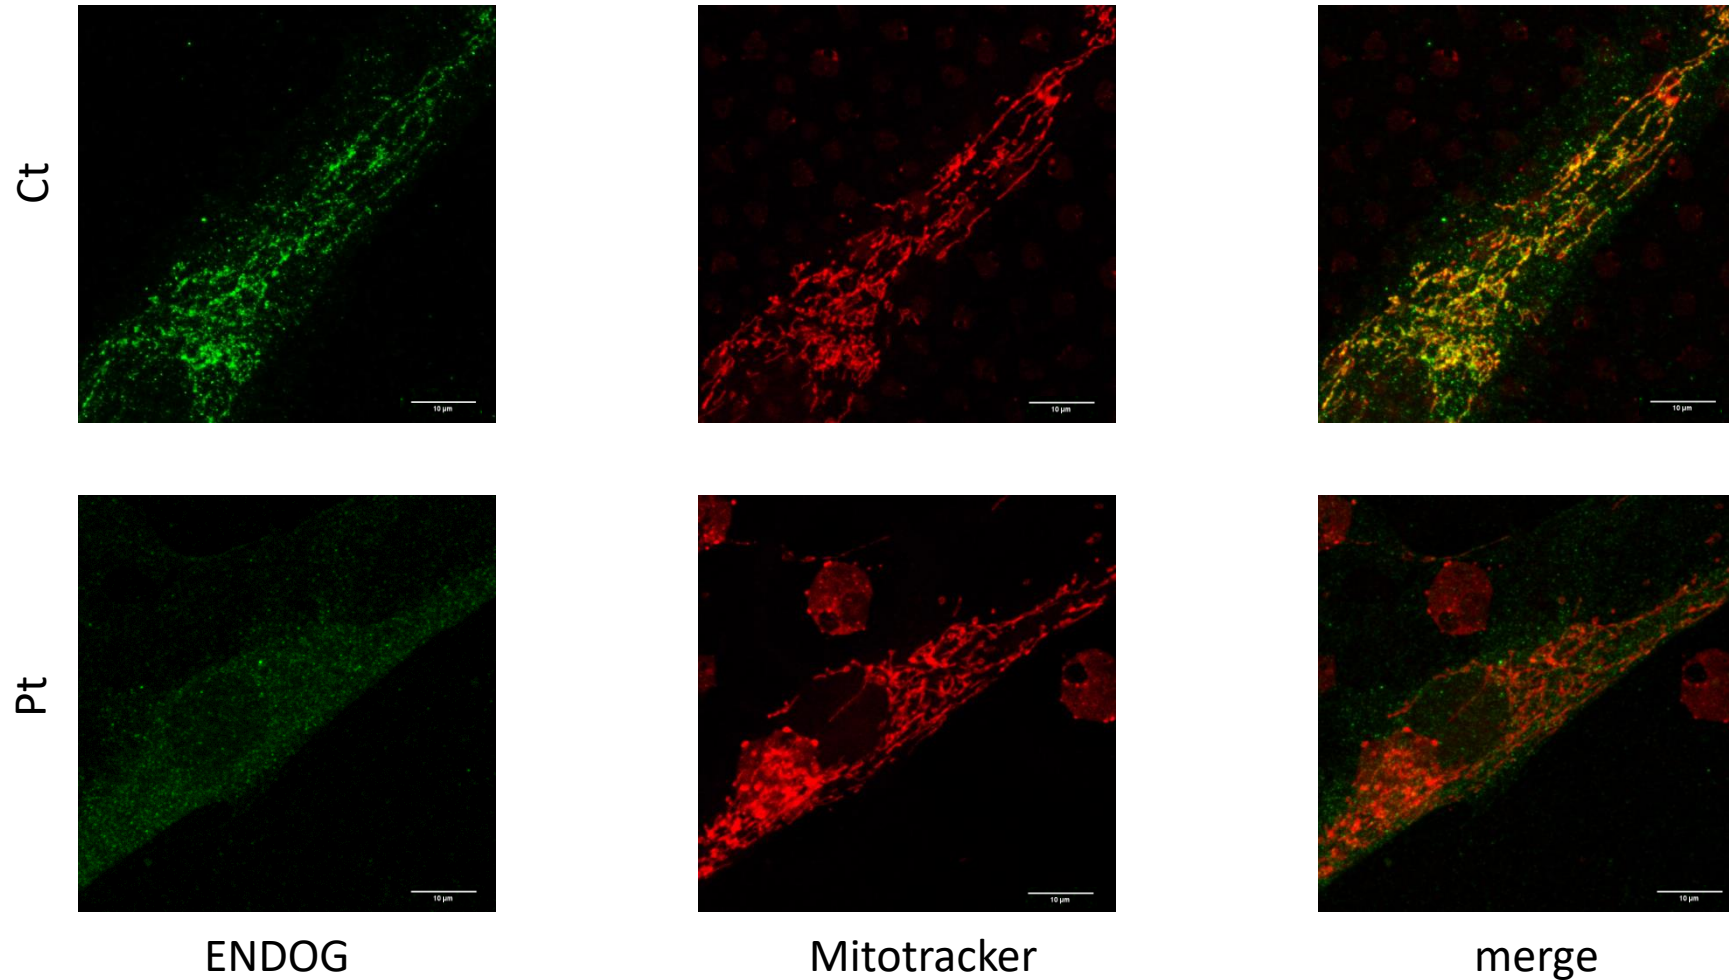

Staining obtained with the anti-ENDOG antibody (green) and the mitochondrial marker Mitotracker Red (red) in fibroblasts from the patient (Pt) and a control (Ct). The same parameters for imaging acquisition were used for Pt and Ct. The merged signals are reported in the right panels. Scale bar: 10 µm.

## Supplemental Figure S4: Western blot analysis of C1QBP

**A**

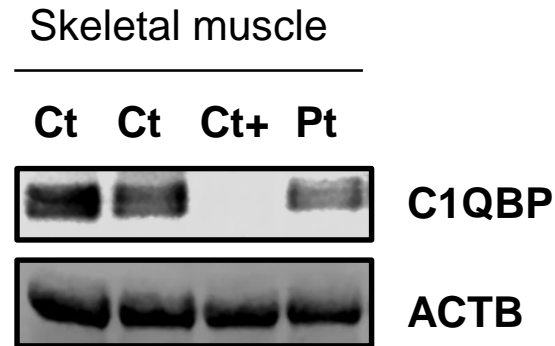

**B**

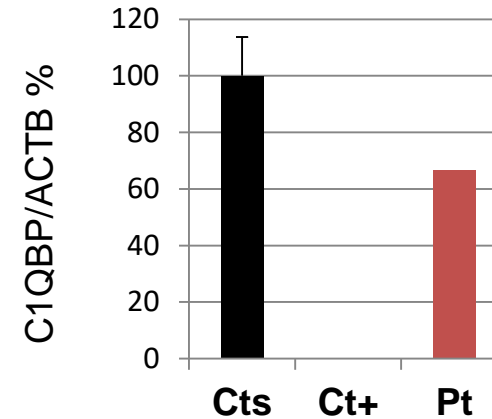

Western blot analysis of C1QBP in skeletal-muscle lysates from control individuals (Ct), a patient harboring biallelic *C1QBP* mutations (Ct+) and the Patient described in the manuscript (Pt). Cytosolic b-actin (ACTB) were used as loading control (panel **A**). Graph reporting protein level normalized to ACTB in percentage, being 100% the mean value of Controls (panel **B**).

## Supplemental Figure S5: *ENDOG* transcript analysis in patient's fibroblasts

**A**

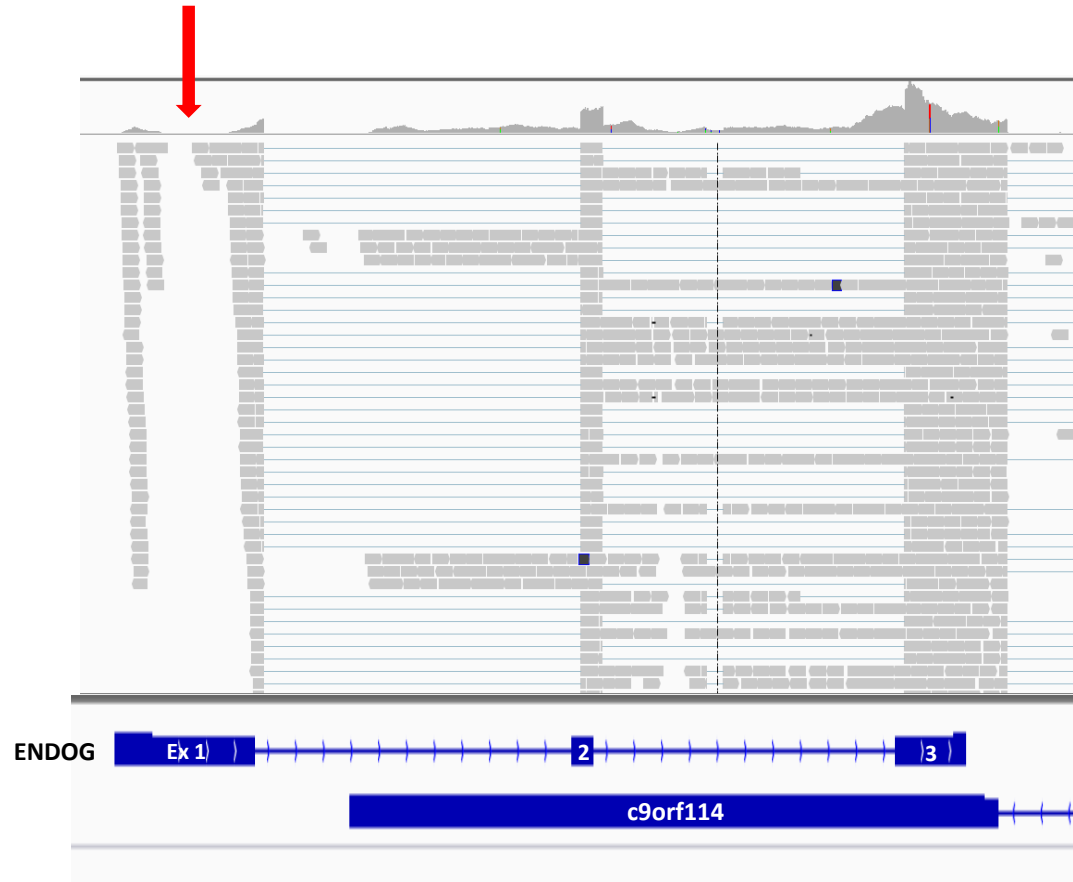

**B**

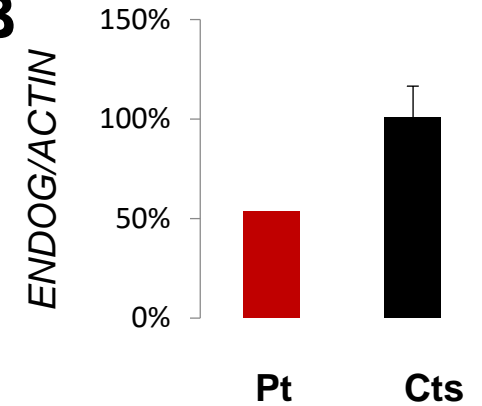

**C**

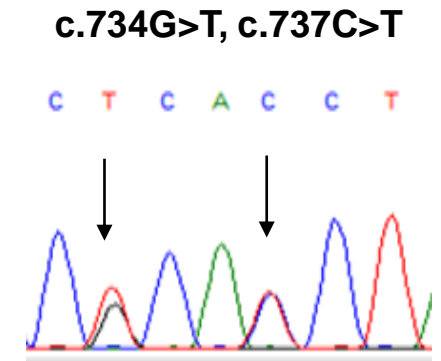

Snapshot from IGV software of the region containing *ENDOG* and *C9orf114* transcripts, obtained by RNA sequencing in patient's fibroblasts. The red arrow indicates the position of the c.61delG within exon 1, not captured in the analysis (panel A). Graph reporting *ENDOG* transcript level normalized to *ACTIN*, being 100% the mean value of Controls (panel B). Electropherograms of the region containing the *ENDOG* missense variants in complementary DNA, retro-transcribed from patient's fibroblasts RNA.
